# Supplementary material for: Driving delivery and uptake of catch-up vaccination among adolescent and adult migrants in UK general practice: a mixed methods pilot study
Source: Springer Nature journal article supplement (doi:10.1186/s12916-024-03378-z), 2024-05-03
Supplement: MOESM2 [file 12916_2024_3378_MOESM2_ESM.pdf]

|                 | Albanian          | Bengali               | Hindi                                                    | Polish                            | Romanian            | Somali                      | Turkish                       | Urdu                                     |
|-----------------|-------------------|-----------------------|----------------------------------------------------------|-----------------------------------|---------------------|-----------------------------|-------------------------------|------------------------------------------|
| MMR             | FRP               | এমএমআর<br>MMR3/MMRV   | (एमएमआर -MMR)<br>वैक्सीन - MR<br>mumps vaccine not given | MMR                               | ROR                 |                             | KKK                           | n/a (given 2 measles vaccines (9 & 15M)) |
| Measles         | Fruthi            | হাম (মিজেলস)          | खसरा / मीजल्स                                            | Odra,                             | Rujeolei/ Pojar     | Jaceecada                   | Kızamık                       | خسرہ                                     |
| Mumps           | Shyta             | মাম্প্‌স বা পনসিকা    | मम्प्स                                                   | Swinka                            | Oreionului          | Qaamow-Qashiirta            | Kabakulak                     | ممپس                                     |
| Rubella         | Rubeolë           | রুবেলা                | रुबेला                                                   | Różyłka                           | Rubeolei,           | Jadeeco jarmalka/ Rubellaha | Kıtmamıkçık                   | روبیلا                                   |
| DTP             | DTP               | ডপট (DPT)             | डीपीटी                                                   | DTP                               | Di-Te-Per/          |                             | DaBT                          |                                          |
| Diphtheria      | Difteri           | ডিপথেরিয়া            | रोहिणी या डिप्थीरिया                                     | Przeciwko blonicy, Blonica        | Difteriei           | Gowracato                   | Difteri                       | ڈیپھیریا (خناق)                          |
| Tetanus         | Tetanoz           | টিটেনাস               | टिटनेस या धनुस्तंभ                                       | Tezec, Tężcowi                    | Tetanosului,        | Teetanada                   | Tetanos                       | ٹیٹنس<br>تشنج                            |
| Pertussis       | Pertusis          | হুপিং কাশি (পারটুসিস) | काली खाँसी<br>(कुक्कुर खाँसी)                            | Krztusiec/ krztuścowi             | Tuse convulsiva     | Xiiqdheer                   | Boğmaca                       | काली केहानसी<br>(परटुसिस)                |
| Polio           | Poliomielit       | পোলিও                 | पोलियो                                                   | Poliomyelitis (IPV)               | Poliomielitei (VPO) | Dabayl/ dabaysha            | Çocuk Felci                   | پولیو<br>(اے پی وی)                      |
| BCG/ TB         | Tuberkuloz (BCG)  | বিসিজি                | बी.सी.जी. (यक्ष्मा)<br>(BCG)                             | Gruźlicy                          | Tuberculozei (BCG)  | Tallaakla Qaaxada           | BCG (verem/ tüberküloz aşısı) | بی سی جی<br>(تب دق)<br>(BCG)             |
| Meningitis ACWY | Meningokokut ACWY | ম্যানানজাইটিস ACWY    | तानिकाशोथ या मस्तिष्कावरणशोथ<br>ACWY                     | Meningokokum ACWY                 | meningococic ACWY   | Qoorgooyaha ACWY            | Meningokokal ACWY             | मिन्गजाँत्स ACWY                         |
| Hepatitis B     | Hepatit viral B   | হেপাটাইটিস B          | हेपेटाइटिस बी                                            | Wirusowe zapaleniu wątroby typu B | Hepatitei virale B  | Cagaarshow nooca B          | Hepatit B                     | ہیپاٹائٹس بی                             |
| Hepatitis C     | Hepatit viral C   | হেপাটাইটিস C          | यकृतशोथ ग<br>(हेपेटाइटिस सी)                             | Wirusowe zapaleniu wątroby typu C | Hepatitei virale C  | Cagaarshow nooca C          | Hepatit C                     | ہیپاٹائٹس سی                             |
